# Supplementary material for: Stability, and optical and electronic properties of ultrathin h-BNC
Source: Royal Society of Chemistry journal article supplement (doi:10.1039/c6cp08730b), 2017-01-01
Supplement: c6cp08730b1.pdf [file c6cp08730b1.pdf]

# Supplementary Material

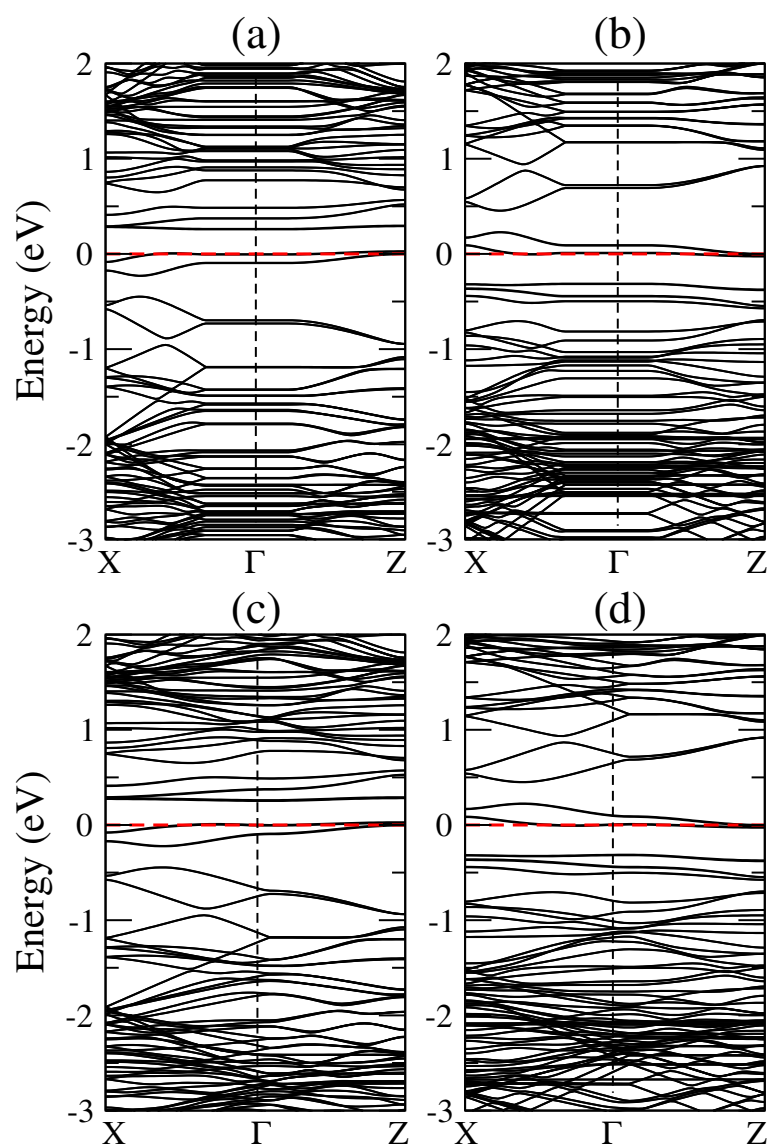

Figure 1: Electronic band structure for the  $B_3N_6$  and  $B_6N_3$  defects. Panels (a) and (b) refer to the enlarged unit cell while (c) and (d) refer to the LYP functional.
